# Supplementary material for: The oncogenic kinase TOPK upregulates in psoriatic keratinocytes and contributes to psoriasis progression by regulating neutrophils infiltration
Source: PubMed Central journal article supplement (PMC11292866; doi:10.1186/s12964-024-01758-9), 2024-08-01
Supplement: 12964_2024_1758_MOESM1_ESM.pdf [file 12964_2024_1758_MOESM1_ESM.pdf]

## Supplementary figure 1

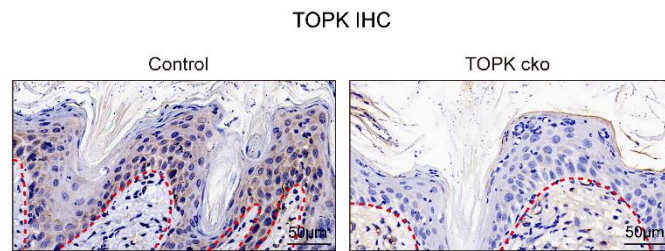

Figure s1. IHC staining of anti-TOPK antibody using the back skin of control psoriatic model mice and TOPK cko psoriatic model mice. Scale bar = 50  $\mu$ m.
