# Supplementary material for: The oncogenic kinase TOPK upregulates in psoriatic keratinocytes and contributes to psoriasis progression by regulating neutrophils infiltration
Source: PubMed Central journal article supplement (PMC11292866; doi:10.1186/s12964-024-01758-9), 2024-08-01
Supplement: 12964_2024_1758_MOESM2_ESM.pdf [file 12964_2024_1758_MOESM2_ESM.pdf]

## Supplementary figure 2

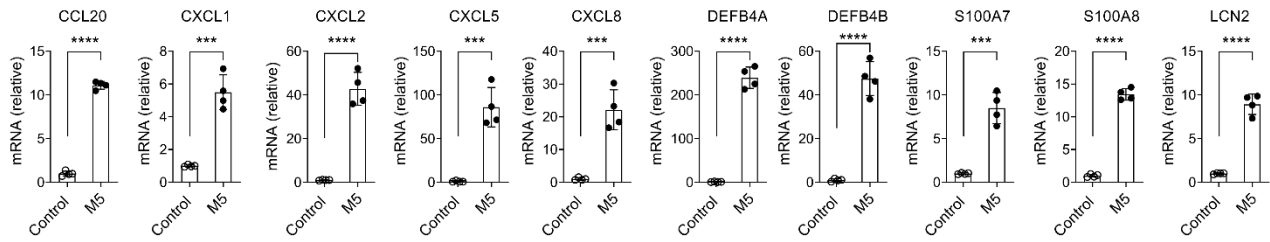

Figure s2. M5 cocktail cytokines induce the upregulation of psoriasis related T cell chemokines, neutrophil chemokines, and antimicrobial peptides in HaCat cells.
