# Supplementary material for: The oncogenic kinase TOPK upregulates in psoriatic keratinocytes and contributes to psoriasis progression by regulating neutrophils infiltration
Source: PubMed Central journal article supplement (PMC11292866; doi:10.1186/s12964-024-01758-9), 2024-08-01
Supplement: 12964_2024_1758_MOESM3_ESM.pdf [file 12964_2024_1758_MOESM3_ESM.pdf]

### Supplementary figure 3

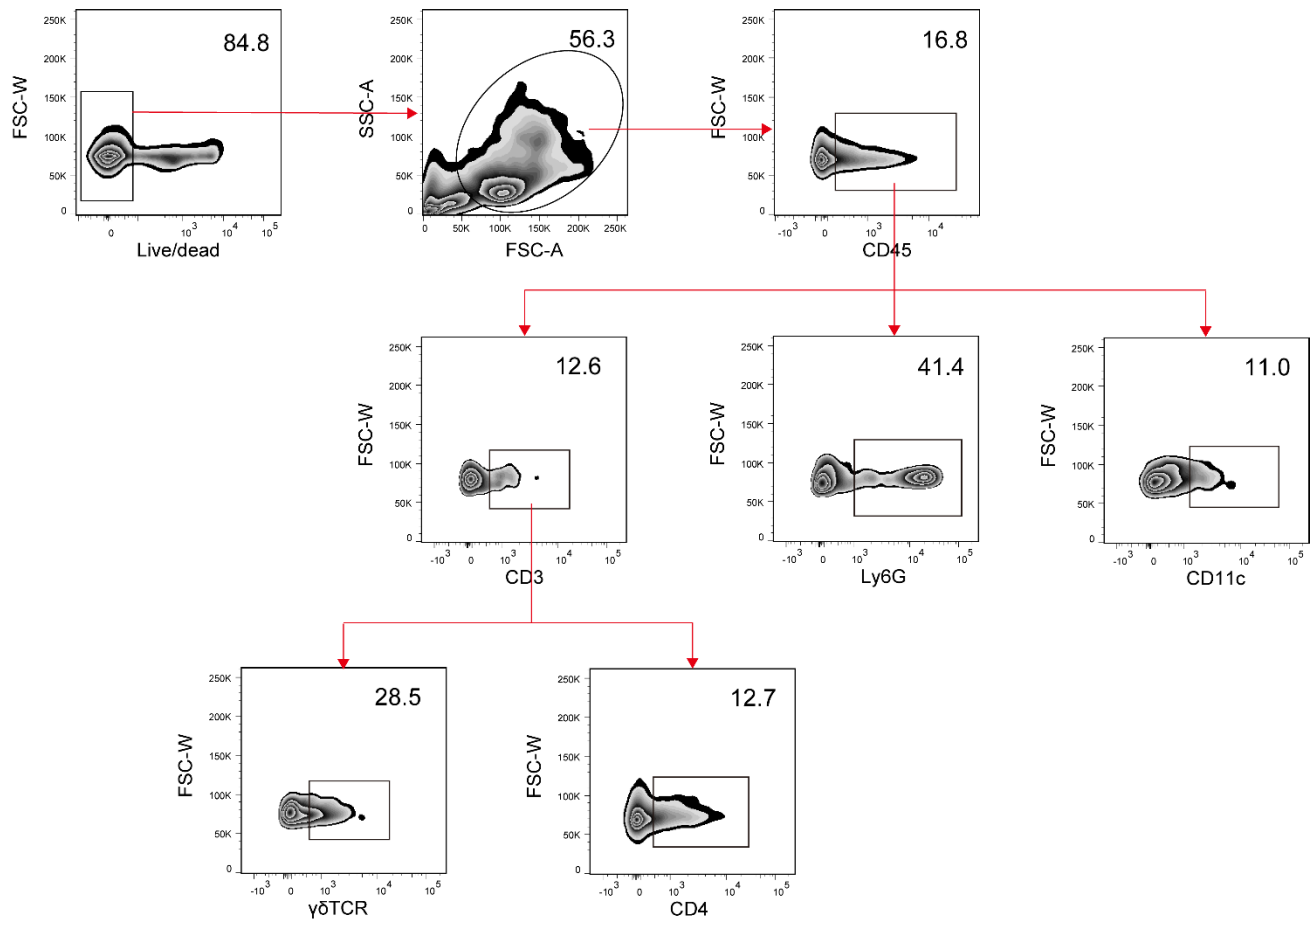

Figure s3. Gating strategy of flow cytometry in this study.
